# Supplementary material for: Review of methods used by chiropractors to determine the site for applying manipulation
Source: Chiropr Man Therap. 2013 Oct 21;21:36. doi: 10.1186/2045-709X-21-36 (PMC4028787; doi:10.1186/2045-709X-21-36)
Supplement: Additional file 2 — QAREL question level data. [file 2045-709X-21-36-S2.xlsx]

## Sheet: Sheet1
Author and Year of Paper	1. Was the test evaluated in a sample of subjects who were representative of those to whom the authors intended the results to be applied?	2. Was the test performed by raters who were representative of those to whom the authors intended the results to be applied?	3. Were raters blinded to the findings of other raters during the study?	4. Were raters blinded to their own prior findings of the test under evaluation?	5. Were raters blinded to the subjects’ disease status or the results of the accepted reference standard for the target disorder (or variable) being evaluated?	6. Were raters blinded to clinical information that was not intended to form part of the study design or testing procedure?	7. Was the order of examination varied?	8. Was the stability (or theoretical stability) of the variable being measured taken into account when determining the suitability of the time interval among repeated measures?	9. Was the test applied correctly and interpreted appropriately?	10. Were appropriate statistical measures of agreement used?
Agarwal_2005	YES	NO, UNCLEAR or N/A	NO, UNCLEAR or N/A	NO, UNCLEAR or N/A	NO, UNCLEAR or N/A	NO, UNCLEAR or N/A	NO, UNCLEAR or N/A	YES	YES	YES
Amiri_2003	NO, UNCLEAR or N/A	YES	NO, UNCLEAR or N/A	NO, UNCLEAR or N/A	NO, UNCLEAR or N/A	NO, UNCLEAR or N/A	NO, UNCLEAR or N/A	YES	YES	YES
Antos_1990	YES	YES	YES	NO, UNCLEAR or N/A	NO, UNCLEAR or N/A	NO, UNCLEAR or N/A	YES	NO, UNCLEAR or N/A	YES	YES
Arab_2009	YES	YES	YES	NO, UNCLEAR or N/A	YES	NO, UNCLEAR or N/A	YES	YES	YES	YES
Bergstrom_1986	NO, UNCLEAR or N/A	NO, UNCLEAR or N/A	YES	NO, UNCLEAR or N/A	NO, UNCLEAR or N/A	NO, UNCLEAR or N/A	NO, UNCLEAR or N/A	NO, UNCLEAR or N/A	YES	NO, UNCLEAR or N/A
Bertilson_2003	YES	YES	YES	NO, UNCLEAR or N/A	NO, UNCLEAR or N/A	YES	YES	YES	YES	YES
Binkley_1995	NO, UNCLEAR or N/A	YES	NO, UNCLEAR or N/A	NO, UNCLEAR or N/A	NO, UNCLEAR or N/A	YES	YES	YES	YES	YES
Bo&Hilde_1997	NO, UNCLEAR or N/A	YES	YES	NO, UNCLEAR or N/A	NO, UNCLEAR or N/A	NO, UNCLEAR or N/A	NO, UNCLEAR or N/A	YES	YES	YES
Bockenhauer_2007	NO, UNCLEAR or N/A	YES	YES	NO, UNCLEAR or N/A	NO, UNCLEAR or N/A	NO, UNCLEAR or N/A	NO, UNCLEAR or N/A	NO, UNCLEAR or N/A	YES	YES
Boline_1988	YES	NO, UNCLEAR or N/A	NO, UNCLEAR or N/A	NO, UNCLEAR or N/A	NO, UNCLEAR or N/A	YES	YES	NO, UNCLEAR or N/A	YES	YES
Boline_1993	YES	YES	YES	NO, UNCLEAR or N/A	NO, UNCLEAR or N/A	NO, UNCLEAR or N/A	YES	NO, UNCLEAR or N/A	YES	YES
Breum_1995	NO, UNCLEAR or N/A	NO, UNCLEAR or N/A	YES	NO, UNCLEAR or N/A	NO, UNCLEAR or N/A	NO, UNCLEAR or N/A	YES	YES	YES	YES
Brismee_2005	YES	YES	YES	NO, UNCLEAR or N/A	NO, UNCLEAR or N/A	NO, UNCLEAR or N/A	YES	YES	YES	YES
Brismee_2006	NO, UNCLEAR or N/A	YES	YES	NO, UNCLEAR or N/A	YES	YES	YES	YES	YES	NO, UNCLEAR or N/A
Byfield_1992	NO, UNCLEAR or N/A	YES	YES	NO, UNCLEAR or N/A	NO, UNCLEAR or N/A	NO, UNCLEAR or N/A	NO, UNCLEAR or N/A	YES	YES	YES
Calderon_1994	NO, UNCLEAR or N/A	YES	YES	NO, UNCLEAR or N/A	YES	NO, UNCLEAR or N/A	NO, UNCLEAR or N/A	NO, UNCLEAR or N/A	YES	YES
Carmichael_1987	NO, UNCLEAR or N/A	NO, UNCLEAR or N/A	YES	YES	NO, UNCLEAR or N/A	NO, UNCLEAR or N/A	NO, UNCLEAR or N/A	NO, UNCLEAR or N/A	YES	YES
Chakraverty_2007	YES	YES	YES	NO, UNCLEAR or N/A	NO, UNCLEAR or N/A	NO, UNCLEAR or N/A	NO, UNCLEAR or N/A	NO, UNCLEAR or N/A	YES	YES
Chiarello_1993	YES	YES	NO, UNCLEAR or N/A	NO, UNCLEAR or N/A	NO, UNCLEAR or N/A	NO, UNCLEAR or N/A	YES	NO, UNCLEAR or N/A	YES	YES
Christensen_2002	YES	YES	YES	NO, UNCLEAR or N/A	YES	YES	YES	YES	YES	YES
Cibulka_1999	YES	YES	NO, UNCLEAR or N/A	NO, UNCLEAR or N/A	NO, UNCLEAR or N/A	NO, UNCLEAR or N/A	NO, UNCLEAR or N/A	NO, UNCLEAR or N/A	YES	YES
Clare_2004	YES	YES	YES	NO, UNCLEAR or N/A	YES	NO, UNCLEAR or N/A	NO, UNCLEAR or N/A	YES	YES	YES
Cleland_2006	YES	YES	YES	NO, UNCLEAR or N/A	NO, UNCLEAR or N/A	NO, UNCLEAR or N/A	YES	YES	YES	YES
Comeaux_2001	YES	YES	YES	NO, UNCLEAR or N/A	YES	YES	NO, UNCLEAR or N/A	NO, UNCLEAR or N/A	YES	YES
Cook_2004	YES	YES	YES	NO, UNCLEAR or N/A	NO, UNCLEAR or N/A	NO, UNCLEAR or N/A	NO, UNCLEAR or N/A	YES	YES	YES
Cooperstein_2010	NO, UNCLEAR or N/A	YES	YES	NO, UNCLEAR or N/A	YES	YES	YES	NO, UNCLEAR or N/A	YES	YES
Cowherd_1992	NO, UNCLEAR or N/A	NO, UNCLEAR or N/A	NO, UNCLEAR or N/A	NO, UNCLEAR or N/A	NO, UNCLEAR or N/A	NO, UNCLEAR or N/A	NO, UNCLEAR or N/A	NO, UNCLEAR or N/A	NO, UNCLEAR or N/A	NO, UNCLEAR or N/A
Croft_1994	YES	YES	YES	NO, UNCLEAR or N/A	YES	YES	NO, UNCLEAR or N/A	YES	YES	YES
Danneels_2001	NO, UNCLEAR or N/A	NO, UNCLEAR or N/A	NO, UNCLEAR or N/A	NO, UNCLEAR or N/A	NO, UNCLEAR or N/A	NO, UNCLEAR or N/A	NO, UNCLEAR or N/A	YES	YES	YES
Degenhardt_2005	NO, UNCLEAR or N/A	YES	YES	NO, UNCLEAR or N/A	NO, UNCLEAR or N/A	NO, UNCLEAR or N/A	YES	NO, UNCLEAR or N/A	YES	YES
Diakow_1988	NO, UNCLEAR or N/A	YES	YES	NO, UNCLEAR or N/A	NO, UNCLEAR or N/A	NO, UNCLEAR or N/A	NO, UNCLEAR or N/A	NO, UNCLEAR or N/A	NO, UNCLEAR or N/A	YES
Downey_2003	YES	YES	YES	NO, UNCLEAR or N/A	YES	YES	YES	YES	YES	YES
Fjelhner_1999	NO, UNCLEAR or N/A	YES	YES	NO, UNCLEAR or N/A	YES	YES	YES	YES	YES	YES
French_2000	YES	YES	YES	NO, UNCLEAR or N/A	NO, UNCLEAR or N/A	NO, UNCLEAR or N/A	YES	YES	NO, UNCLEAR or N/A	YES
Fryer_2005	NO, UNCLEAR or N/A	NO, UNCLEAR or N/A	YES	YES	YES	YES	YES	NO, UNCLEAR or N/A	YES	YES
Fryer_2006	NO, UNCLEAR or N/A	YES	YES	YES	NO, UNCLEAR or N/A	NO, UNCLEAR or N/A	YES	NO, UNCLEAR or N/A	YES	YES
Fuhr_1989	NO, UNCLEAR or N/A	YES	NO, UNCLEAR or N/A	NO, UNCLEAR or N/A	NO, UNCLEAR or N/A	NO, UNCLEAR or N/A	NO, UNCLEAR or N/A	NO, UNCLEAR or N/A	YES	YES
Gemmell_1990	YES	YES	YES	NO, UNCLEAR or N/A	NO, UNCLEAR or N/A	NO, UNCLEAR or N/A	YES	YES	YES	YES
Ghoukssian_2001	NO, UNCLEAR or N/A	YES	YES	NO, UNCLEAR or N/A	NO, UNCLEAR or N/A	NO, UNCLEAR or N/A	NO, UNCLEAR or N/A	NO, UNCLEAR or N/A	YES	NO, UNCLEAR or N/A
Gibbons_2002	NO, UNCLEAR or N/A	NO, UNCLEAR or N/A	NO, UNCLEAR or N/A	NO, UNCLEAR or N/A	NO, UNCLEAR or N/A	NO, UNCLEAR or N/A	YES	YES	YES	YES
Gross_1998	YES	NO, UNCLEAR or N/A	YES	NO, UNCLEAR or N/A	NO, UNCLEAR or N/A	NO, UNCLEAR or N/A	NO, UNCLEAR or N/A	NO, UNCLEAR or N/A	YES	YES
Haas&Raphael_1995	YES	YES	YES	YES	YES	YES	YES	YES	YES	YES
Haas&Peterson_1992	YES	YES	YES	NO, UNCLEAR or N/A	YES	YES	YES	YES	YES	NO, UNCLEAR or N/A
Haas_1990	NO, UNCLEAR or N/A	YES	YES	NO, UNCLEAR or N/A	NO, UNCLEAR or N/A	YES	NO, UNCLEAR or N/A	NO, UNCLEAR or N/A	YES	YES
Haas_1993	YES	YES	YES	YES	YES	YES	YES	YES	YES	YES
Hall_2004	YES	YES	YES	NO, UNCLEAR or N/A	YES	YES	NO, UNCLEAR or N/A	NO, UNCLEAR or N/A	YES	YES
Hanada_2001	NO, UNCLEAR or N/A	NO, UNCLEAR or N/A	YES	NO, UNCLEAR or N/A	NO, UNCLEAR or N/A	NO, UNCLEAR or N/A	NO, UNCLEAR or N/A	YES	YES	YES
Hanten_2002	YES	NO, UNCLEAR or N/A	YES	NO, UNCLEAR or N/A	NO, UNCLEAR or N/A	NO, UNCLEAR or N/A	YES	YES	NO, UNCLEAR or N/A	YES
Hart_2007	NO, UNCLEAR or N/A	YES	YES	YES	NO, UNCLEAR or N/A	NO, UNCLEAR or N/A	NO, UNCLEAR or N/A	YES	YES	YES
Haswell_2004	YES	YES	YES	NO, UNCLEAR or N/A	YES	YES	NO, UNCLEAR or N/A	YES	YES	YES
Hawk_1999	NO, UNCLEAR or N/A	YES	YES	NO, UNCLEAR or N/A	NO, UNCLEAR or N/A	NO, UNCLEAR or N/A	NO, UNCLEAR or N/A	YES	YES	YES
Haynes_2002	NO, UNCLEAR or N/A	YES	YES	NO, UNCLEAR or N/A	NO, UNCLEAR or N/A	NO, UNCLEAR or N/A	NO, UNCLEAR or N/A	NO, UNCLEAR or N/A	YES	YES
Heiderscheit_2008	NO, UNCLEAR or N/A	YES	YES	NO, UNCLEAR or N/A	NO, UNCLEAR or N/A	NO, UNCLEAR or N/A	NO, UNCLEAR or N/A	NO, UNCLEAR or N/A	YES	YES
Heiss_2004	YES	YES	YES	NO, UNCLEAR or N/A	NO, UNCLEAR or N/A	NO, UNCLEAR or N/A	NO, UNCLEAR or N/A	YES	YES	YES
Herzog_1989	YES	YES	YES	NO, UNCLEAR or N/A	NO, UNCLEAR or N/A	NO, UNCLEAR or N/A	NO, UNCLEAR or N/A	YES	YES	YES
Hicks_2003	YES	YES	YES	YES	NO, UNCLEAR or N/A	NO, UNCLEAR or N/A	NO, UNCLEAR or N/A	YES	YES	YES
Hinson_1998	NO, UNCLEAR or N/A	YES	YES	NO, UNCLEAR or N/A	NO, UNCLEAR or N/A	NO, UNCLEAR or N/A	NO, UNCLEAR or N/A	NO, UNCLEAR or N/A	YES	YES
Holmgren_2008	YES	YES	YES	YES	YES	NO, UNCLEAR or N/A	YES	YES	YES	YES
Holt_2009	NO, UNCLEAR or N/A	NO, UNCLEAR or N/A	YES	NO, UNCLEAR or N/A	NO, UNCLEAR or N/A	NO, UNCLEAR or N/A	YES	YES	YES	YES
Hoppenbrouwers_2006	YES	NO, UNCLEAR or N/A	YES	NO, UNCLEAR or N/A	YES	NO, UNCLEAR or N/A	YES	NO, UNCLEAR or N/A	YES	YES
Horneij_2002	NO, UNCLEAR or N/A	YES	YES	NO, UNCLEAR or N/A	YES	NO, UNCLEAR or N/A	YES	NO, UNCLEAR or N/A	YES	YES
Hsieh_1990	NO, UNCLEAR or N/A	YES	NO, UNCLEAR or N/A	NO, UNCLEAR or N/A	NO, UNCLEAR or N/A	NO, UNCLEAR or N/A	NO, UNCLEAR or N/A	NO, UNCLEAR or N/A	YES	YES
Hubka_1994	YES	YES	YES	NO, UNCLEAR or N/A	NO, UNCLEAR or N/A	NO, UNCLEAR or N/A	YES	NO, UNCLEAR or N/A	YES	NO, UNCLEAR or N/A
Hungerford_2007	YES	YES	NO, UNCLEAR or N/A	NO, UNCLEAR or N/A	NO, UNCLEAR or N/A	NO, UNCLEAR or N/A	YES	NO, UNCLEAR or N/A	YES	YES
Hunt_2001	NO, UNCLEAR or N/A	YES	YES	NO, UNCLEAR or N/A	NO, UNCLEAR or N/A	NO, UNCLEAR or N/A	NO, UNCLEAR or N/A	NO, UNCLEAR or N/A	YES	YES
Jackson_1993	YES	YES	YES	YES	NO, UNCLEAR or N/A	NO, UNCLEAR or N/A	YES	YES	YES	NO, UNCLEAR or N/A
Jackson_1998	YES	NO, UNCLEAR or N/A	YES	NO, UNCLEAR or N/A	NO, UNCLEAR or N/A	NO, UNCLEAR or N/A	NO, UNCLEAR or N/A	YES	YES	NO, UNCLEAR or N/A
Johansson_2006	YES	YES	YES	NO, UNCLEAR or N/A	YES	YES	YES	YES	YES	YES
Keating_1990	YES	YES	YES	NO, UNCLEAR or N/A	NO, UNCLEAR or N/A	YES	YES	YES	YES	YES
Kim_2007	NO, UNCLEAR or N/A	YES	YES	NO, UNCLEAR or N/A	NO, UNCLEAR or N/A	NO, UNCLEAR or N/A	NO, UNCLEAR or N/A	NO, UNCLEAR or N/A	YES	YES
Kmita_2008	YES	YES	YES	YES	YES	YES	YES	YES	YES	YES
Kokmeyer_2002	YES	NO, UNCLEAR or N/A	YES	NO, UNCLEAR or N/A	YES	YES	YES	NO, UNCLEAR or N/A	YES	YES
Laslett_1994	YES	YES	YES	NO, UNCLEAR or N/A	NO, UNCLEAR or N/A	NO, UNCLEAR or N/A	YES	YES	YES	YES
Latimer_1998	NO, UNCLEAR or N/A	NO, UNCLEAR or N/A	NO, UNCLEAR or N/A	NO, UNCLEAR or N/A	NO, UNCLEAR or N/A	NO, UNCLEAR or N/A	NO, UNCLEAR or N/A	NO, UNCLEAR or N/A	YES	YES
Leach_2003	NO, UNCLEAR or N/A	YES	YES	YES	YES	NO, UNCLEAR or N/A	YES	NO, UNCLEAR or N/A	YES	YES
Leard_2009	YES	NO, UNCLEAR or N/A	YES	YES	YES	NO, UNCLEAR or N/A	NO, UNCLEAR or N/A	NO, UNCLEAR or N/A	YES	YES
Lee_2002	YES	YES	NO, UNCLEAR or N/A	NO, UNCLEAR or N/A	NO, UNCLEAR or N/A	NO, UNCLEAR or N/A	NO, UNCLEAR or N/A	YES	YES	YES
Love_1987	NO, UNCLEAR or N/A	YES	YES	YES	NO, UNCLEAR or N/A	YES	NO, UNCLEAR or N/A	YES	YES	YES
Ludtke_2001	YES	YES	NO, UNCLEAR or N/A	NO, UNCLEAR or N/A	NO, UNCLEAR or N/A	YES	NO, UNCLEAR or N/A	YES	YES	YES
Lundberg_1999	YES	YES	YES	NO, UNCLEAR or N/A	NO, UNCLEAR or N/A	NO, UNCLEAR or N/A	YES	YES	YES	YES
Maher_1994	YES	YES	YES	NO, UNCLEAR or N/A	NO, UNCLEAR or N/A	NO, UNCLEAR or N/A	YES	YES	YES	YES
Maigne_2009	YES	YES	YES	YES	NO, UNCLEAR or N/A	YES	YES	NO, UNCLEAR or N/A	YES	YES
Marcotte_2002	NO, UNCLEAR or N/A	YES	YES	NO, UNCLEAR or N/A	NO, UNCLEAR or N/A	NO, UNCLEAR or N/A	NO, UNCLEAR or N/A	YES	YES	YES
Marcotte_2005	NO, UNCLEAR or N/A	NO, UNCLEAR or N/A	YES	NO, UNCLEAR or N/A	NO, UNCLEAR or N/A	NO, UNCLEAR or N/A	NO, UNCLEAR or N/A	NO, UNCLEAR or N/A	NO, UNCLEAR or N/A	NO, UNCLEAR or N/A
Mayer_2004	YES	YES	YES	NO, UNCLEAR or N/A	NO, UNCLEAR or N/A	NO, UNCLEAR or N/A	NO, UNCLEAR or N/A	NO, UNCLEAR or N/A	NO, UNCLEAR or N/A	NO, UNCLEAR or N/A
McCombe_1989	YES	YES	NO, UNCLEAR or N/A	NO, UNCLEAR or N/A	NO, UNCLEAR or N/A	NO, UNCLEAR or N/A	NO, UNCLEAR or N/A	YES	YES	YES
McKenzie_1997	YES	YES	YES	YES	NO, UNCLEAR or N/A	NO, UNCLEAR or N/A	NO, UNCLEAR or N/A	NO, UNCLEAR or N/A	YES	YES
McPartland_1996	YES	YES	YES	NO, UNCLEAR or N/A	NO, UNCLEAR or N/A	NO, UNCLEAR or N/A	YES	YES	YES	YES
Meijne_1999	NO, UNCLEAR or N/A	NO, UNCLEAR or N/A	YES	NO, UNCLEAR or N/A	YES	NO, UNCLEAR or N/A	NO, UNCLEAR or N/A	NO, UNCLEAR or N/A	YES	YES
Mior_1985	NO, UNCLEAR or N/A	NO, UNCLEAR or N/A	NO, UNCLEAR or N/A	YES	NO, UNCLEAR or N/A	YES	NO, UNCLEAR or N/A	NO, UNCLEAR or N/A	YES	YES
Mootz_1989	NO, UNCLEAR or N/A	YES	NO, UNCLEAR or N/A	NO, UNCLEAR or N/A	NO, UNCLEAR or N/A	NO, UNCLEAR or N/A	YES	YES	YES	YES
Moran_2001	NO, UNCLEAR or N/A	YES	YES	NO, UNCLEAR or N/A	NO, UNCLEAR or N/A	YES	YES	YES	YES	NO, UNCLEAR or N/A
Nansel_1989	NO, UNCLEAR or N/A	YES	YES	NO, UNCLEAR or N/A	NO, UNCLEAR or N/A	YES	YES	YES	YES	NO, UNCLEAR or N/A
Nguyen_1999	YES	YES	YES	NO, UNCLEAR or N/A	YES	NO, UNCLEAR or N/A	YES	YES	YES	YES
Normand_2007	NO, UNCLEAR or N/A	YES	YES	NO, UNCLEAR or N/A	NO, UNCLEAR or N/A	NO, UNCLEAR or N/A	NO, UNCLEAR or N/A	NO, UNCLEAR or N/A	YES	YES
O'Haire_2000	NO, UNCLEAR or N/A	YES	YES	NO, UNCLEAR or N/A	NO, UNCLEAR or N/A	NO, UNCLEAR or N/A	YES	YES	YES	YES
Olson_1998	NO, UNCLEAR or N/A	YES	NO, UNCLEAR or N/A	NO, UNCLEAR or N/A	NO, UNCLEAR or N/A	NO, UNCLEAR or N/A	NO, UNCLEAR or N/A	YES	YES	YES
Olson_2009	NO, UNCLEAR or N/A	NO, UNCLEAR or N/A	YES	YES	NO, UNCLEAR or N/A	NO, UNCLEAR or N/A	YES	NO, UNCLEAR or N/A	YES	NO, UNCLEAR or N/A
Owens_2000	NO, UNCLEAR or N/A	YES	YES	NO, UNCLEAR or N/A	NO, UNCLEAR or N/A	NO, UNCLEAR or N/A	NO, UNCLEAR or N/A	NO, UNCLEAR or N/A	NO, UNCLEAR or N/A	YES
Owens_2004	NO, UNCLEAR or N/A	YES	NO, UNCLEAR or N/A	NO, UNCLEAR or N/A	NO, UNCLEAR or N/A	NO, UNCLEAR or N/A	YES	YES	YES	NO, UNCLEAR or N/A
Owens_2007	YES	YES	NO, UNCLEAR or N/A	NO, UNCLEAR or N/A	NO, UNCLEAR or N/A	NO, UNCLEAR or N/A	NO, UNCLEAR or N/A	YES	YES	NO, UNCLEAR or N/A
Paatelma_2010	YES	YES	YES	NO, UNCLEAR or N/A	NO, UNCLEAR or N/A	NO, UNCLEAR or N/A	YES	NO, UNCLEAR or N/A	YES	YES
Paulet_2009	NO, UNCLEAR or N/A	NO, UNCLEAR or N/A	YES	NO, UNCLEAR or N/A	YES	YES	NO, UNCLEAR or N/A	NO, UNCLEAR or N/A	YES	YES
Paydar_1994	NO, UNCLEAR or N/A	NO, UNCLEAR or N/A	NO, UNCLEAR or N/A	NO, UNCLEAR or N/A	NO, UNCLEAR or N/A	NO, UNCLEAR or N/A	YES	YES	YES	YES
Peterson_2004	YES	YES	NO, UNCLEAR or N/A	NO, UNCLEAR or N/A	NO, UNCLEAR or N/A	YES	YES	YES	YES	YES
Petrone_2003	YES	YES	YES	NO, UNCLEAR or N/A	NO, UNCLEAR or N/A	NO, UNCLEAR or N/A	NO, UNCLEAR or N/A	YES	YES	YES
Phillips_1986	YES	YES	YES	NO, UNCLEAR or N/A	YES	YES	NO, UNCLEAR or N/A	YES	YES	NO, UNCLEAR or N/A
Piva_2003	YES	YES	YES	NO, UNCLEAR or N/A	NO, UNCLEAR or N/A	NO, UNCLEAR or N/A	YES	YES	YES	YES
Piva_2006	YES	NO, UNCLEAR or N/A	YES	YES	YES	YES	YES	YES	YES	YES
Plaugher_1991 #67	NO, UNCLEAR or N/A	YES	NO, UNCLEAR or N/A	YES	NO, UNCLEAR or N/A	YES	YES	NO, UNCLEAR or N/A	YES	YES
Plaugher_1991 #107	YES	YES	YES	YES	YES	YES	YES	YES	YES	YES
Plaugher_1993	NO, UNCLEAR or N/A	YES	YES	NO, UNCLEAR or N/A	NO, UNCLEAR or N/A	NO, UNCLEAR or N/A	NO, UNCLEAR or N/A	NO, UNCLEAR or N/A	YES	YES
Pool_2004	YES	YES	YES	NO, UNCLEAR or N/A	NO, UNCLEAR or N/A	NO, UNCLEAR or N/A	YES	YES	YES	YES
Potter_2006	NO, UNCLEAR or N/A	YES	YES	YES	NO, UNCLEAR or N/A	NO, UNCLEAR or N/A	YES	YES	YES	YES
Qvistgraad-Rasmussen_2007	YES	YES	YES	YES	YES	YES	YES	NO, UNCLEAR or N/A	YES	YES
Rhodes_1995	YES	YES	YES	NO, UNCLEAR or N/A	YES	NO, UNCLEAR or N/A	YES	NO, UNCLEAR or N/A	YES	YES
Rhudy_1988	YES	YES	YES	NO, UNCLEAR or N/A	NO, UNCLEAR or N/A	NO, UNCLEAR or N/A	YES	YES	YES	YES
Riddle_2002	YES	YES	NO, UNCLEAR or N/A	NO, UNCLEAR or N/A	NO, UNCLEAR or N/A	NO, UNCLEAR or N/A	NO, UNCLEAR or N/A	YES	YES	YES
Robinson_2007	YES	YES	NO, UNCLEAR or N/A	YES	YES	YES	YES	YES	YES	YES
Robinson_2009	NO, UNCLEAR or N/A	YES	YES	NO, UNCLEAR or N/A	YES	NO, UNCLEAR or N/A	YES	YES	YES	YES
Rouwmaat_1998	NO, UNCLEAR or N/A	YES	YES	YES	YES	YES	YES	YES	YES	YES
Roy_2006	NO, UNCLEAR or N/A	NO, UNCLEAR or N/A	NO, UNCLEAR or N/A	NO, UNCLEAR or N/A	NO, UNCLEAR or N/A	NO, UNCLEAR or N/A	NO, UNCLEAR or N/A	YES	YES	YES
Schneider_2007	YES	YES	YES	NO, UNCLEAR or N/A	NO, UNCLEAR or N/A	NO, UNCLEAR or N/A	NO, UNCLEAR or N/A	NO, UNCLEAR or N/A	NO, UNCLEAR or N/A	YES
Schneider_2008	YES	YES	YES	NO, UNCLEAR or N/A	YES	YES	YES	YES	YES	YES
Seay_2007	NO, UNCLEAR or N/A	NO, UNCLEAR or N/A	NO, UNCLEAR or N/A	YES	NO, UNCLEAR or N/A	NO, UNCLEAR or N/A	NO, UNCLEAR or N/A	NO, UNCLEAR or N/A	NO, UNCLEAR or N/A	YES
Smedmark_2000	YES	YES	YES	NO, UNCLEAR or N/A	NO, UNCLEAR or N/A	NO, UNCLEAR or N/A	YES	YES	YES	YES
Solinger_2000	NO, UNCLEAR or N/A	NO, UNCLEAR or N/A	YES	NO, UNCLEAR or N/A	NO, UNCLEAR or N/A	NO, UNCLEAR or N/A	YES	NO, UNCLEAR or N/A	YES	YES
Strender_1997 (160)	YES	YES	YES	NO, UNCLEAR or N/A	NO, UNCLEAR or N/A	NO, UNCLEAR or N/A	YES	YES	YES	YES
Strender_1997 (167)	YES	YES	YES	NO, UNCLEAR or N/A	NO, UNCLEAR or N/A	NO, UNCLEAR or N/A	YES	NO, UNCLEAR or N/A	YES	YES
Sweat_1988	NO, UNCLEAR or N/A	NO, UNCLEAR or N/A	NO, UNCLEAR or N/A	NO, UNCLEAR or N/A	NO, UNCLEAR or N/A	NO, UNCLEAR or N/A	NO, UNCLEAR or N/A	NO, UNCLEAR or N/A	YES	NO, UNCLEAR or N/A
Tong_2006	YES	YES	YES	NO, UNCLEAR or N/A	NO, UNCLEAR or N/A	NO, UNCLEAR or N/A	NO, UNCLEAR or N/A	NO, UNCLEAR or N/A	YES	YES
Tousignant_2001	NO, UNCLEAR or N/A	YES	YES	NO, UNCLEAR or N/A	NO, UNCLEAR or N/A	NO, UNCLEAR or N/A	NO, UNCLEAR or N/A	YES	YES	YES
Toussaint_1999	NO, UNCLEAR or N/A	NO, UNCLEAR or N/A	YES	YES	YES	YES	NO, UNCLEAR or N/A	NO, UNCLEAR or N/A	YES	NO, UNCLEAR or N/A
Troke_1998	NO, UNCLEAR or N/A	NO, UNCLEAR or N/A	YES	YES	NO, UNCLEAR or N/A	YES	NO, UNCLEAR or N/A	YES	YES	YES
Troke_2007	NO, UNCLEAR or N/A	NO, UNCLEAR or N/A	YES	NO, UNCLEAR or N/A	YES	YES	YES	NO, UNCLEAR or N/A	YES	YES
Troyanovich_1999	YES	NO, UNCLEAR or N/A	YES	YES	YES	YES	YES	YES	YES	YES
Van Dillen_1998	YES	YES	NO, UNCLEAR or N/A	NO, UNCLEAR or N/A	NO, UNCLEAR or N/A	NO, UNCLEAR or N/A	YES	YES	YES	YES
Van Suijlekoma_2000	YES	YES	NO, UNCLEAR or N/A	NO, UNCLEAR or N/A	NO, UNCLEAR or N/A	NO, UNCLEAR or N/A	NO, UNCLEAR or N/A	NO, UNCLEAR or N/A	YES	YES
Vikai_Juntura_1987	YES	YES	NO, UNCLEAR or N/A	NO, UNCLEAR or N/A	YES	YES	YES	NO, UNCLEAR or N/A	YES	YES
Vincent-Smith_1999	NO, UNCLEAR or N/A	NO, UNCLEAR or N/A	YES	NO, UNCLEAR or N/A	NO, UNCLEAR or N/A	NO, UNCLEAR or N/A	YES	YES	YES	YES
Weiner_2006	YES	YES	NO, UNCLEAR or N/A	NO, UNCLEAR or N/A	NO, UNCLEAR or N/A	NO, UNCLEAR or N/A	NO, UNCLEAR or N/A	NO, UNCLEAR or N/A	YES	YES
Woodfield_2011	YES	YES	YES	NO, UNCLEAR or N/A	NO, UNCLEAR or N/A	NO, UNCLEAR or N/A	YES	YES	YES	YES
Younquist_1989	YES	YES	YES	YES	YES	YES	NO, UNCLEAR or N/A	NO, UNCLEAR or N/A	YES	YES
Jende_1997	YES	YES	NO, UNCLEAR or N/A	NO, UNCLEAR or N/A	NO, UNCLEAR or N/A	NO, UNCLEAR or N/A	YES	YES	YES	YES
Harrison_2003	YES	NO, UNCLEAR or N/A	NO, UNCLEAR or N/A	NO, UNCLEAR or N/A	NO, UNCLEAR or N/A	NO, UNCLEAR or N/A	NO, UNCLEAR or N/A	YES	YES	YES
Clare_2005	YES	YES	NO, UNCLEAR or N/A	NO, UNCLEAR or N/A	NO, UNCLEAR or N/A	NO, UNCLEAR or N/A	NO, UNCLEAR or N/A	YES	YES	YES
Razmjou_2000	YES	YES	YES	NO, UNCLEAR or N/A	NO, UNCLEAR or N/A	NO, UNCLEAR or N/A	YES	YES	YES	YES
Kilpikoski_2002	YES	YES	YES	NO, UNCLEAR or N/A	NO, UNCLEAR or N/A	NO, UNCLEAR or N/A	YES	YES	YES	YES
Fortin 1997	YES	NO, UNCLEAR or N/A	NO, UNCLEAR or N/A	NO, UNCLEAR or N/A	NO, UNCLEAR or N/A	NO, UNCLEAR or N/A	NO, UNCLEAR or N/A	NO, UNCLEAR or N/A	YES	NO, UNCLEAR or N/A
Degenhardt_2010	YES	YES	NO, UNCLEAR or N/A	NO, UNCLEAR or N/A	YES	YES	YES	YES	YES	NO, UNCLEAR or N/A
